# Supplementary material
Source: publisher figshare collection journal article supplement (https://sage.figshare.com/ndownloader/files/12370787)
Supplement: Supplementary file 1 [file 12370787]

Table S1

*Relationship between variables*

|                   | Physical<br>symptoms | Worry  | Faith | Peace | Meaning | Mental<br>health | Physical<br>health |
|-------------------|----------------------|--------|-------|-------|---------|------------------|--------------------|
| Physical symptoms | 1                    |        |       |       |         |                  |                    |
| Worry             | .27*                 | 1      |       |       |         |                  |                    |
| Faith             | -.18                 | .29*   | 1     |       |         |                  |                    |
| Peace             | -.29*                | -.46** | .32** | 1     |         |                  |                    |
| Meaning           | -.17                 | -.03   | .44** | .52** | 1       |                  |                    |
| Mental health     | -.50**               | -.53** | .04   | .41** | .37**   | 1                |                    |
| Physical health   | -.30*                | -.18   | .11   | .20   | .36**   | .24*             | 1                  |

*Note* . SF-12 Mental and Physical Health scores are summary scales. \*\*  $p < .01$  \*  $p < .05$
